# Supplementary material
Source: PubMed Central journal article supplement (PMC4248780)
Supplement: CVI.00499-14_zcd999095112so1.pdf [file CVI.00499-14_zcd999095112so1.pdf]

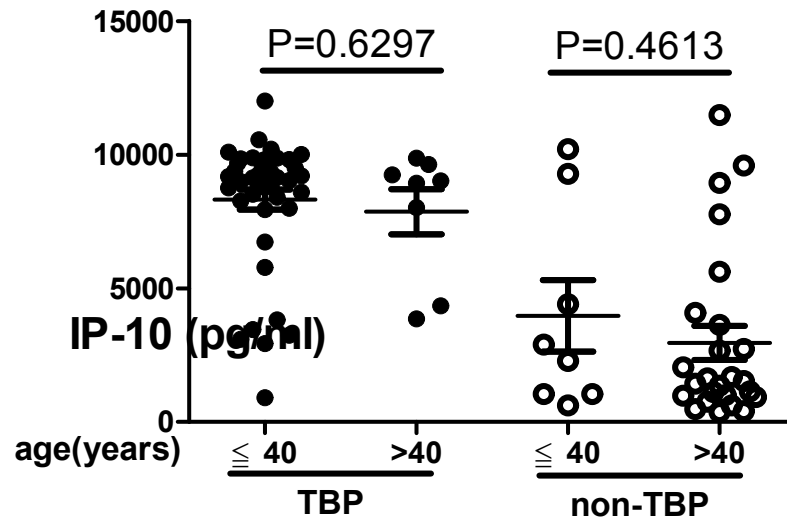

Fig.S1.The age has minimal effect on IP-10 levels in the pleural fluid, both in patients with TBP and non-TB. The level of IP-10 in the pleural fluid from patients TBP (n=51) and non-TB (n=36) were detected by luminex assay. The two groups of patients were divided by the age.
